# Supplementary material for: Compound Heterozygous DOCK8 Mutations in a Patient with B Lymphoblastic Leukemia and EBV-Associated Diffuse Large B Cell Lymphoma
Source: Springer Nature journal article supplement (doi:10.1007/s10875-019-00663-y), 2019-07-02
Supplement: MOESM1 [file 16875350]

#### Additional Supplemental Materials

|  | **DOCK8- deficient patient** | | **Reference ranges from healthy controls** | |
| --- | --- | --- | --- | --- |
| **Cell subset** | **%** | **cells /µl** | **%** | **Abs #** |
| **CD3+ T** | 77 | 219 | 62-87 | 570-2400 |
| **CD4+ T** | 38 | 109 | 32-64 | 430-1800 |
| **CD8+ T** | 39 | 110 | 15-46 | 210-1200 |
| **CD19+ B** | <1 | <1 | 6-23 | 91-610 |
| **CD16+CD56+** | 22 | 62 | 4-26 | 78-470 |
|  |  |  |  |  |
| **Gender** | Male |  |  |  |
| **Age at analysis** | 22 years |  |  |  |

**Supplemental Table 1.** Immunological analysis in the DOCK8-deficient patient. Reference values for healthy controls are provided in the columns on the right.
